# Supplementary material for: The Effect of n-3 PUFA Binding Phosphatidylglycerol on Metabolic Syndrome-Related Parameters and n-3 PUFA Accretion in Diabetic/Obese KK-Ay Mice
Source: PubMed Central journal article supplement (PMC6950267; doi:10.3390/nu11122866), 2019-11-22
Supplement: nutrients-11-02866-s001.pdf [file nutrients-11-02866-s001.pdf]

Supplementary Material

Supplemental Table S1. Nutrient of the experimental diets

| Diet Ingredient (g/kg Diet) | Diets  |             |              |
|-----------------------------|--------|-------------|--------------|
|                             | SoyPC  | n-3 PUFA-PG | n-3 PUFA-TAG |
| Cornstarch                  | 397.86 | 397.86      | 397.86       |
| Dextrinized Starch          | 132    | 132         | 132          |
| Casein                      | 200    | 200         | 200          |
| Sucrose                     | 100    | 100         | 100          |
| Cellulose                   | 50     | 50          | 50           |
| Soybean Oil                 | 50.000 | 50.000      | 56.568       |
| SoyPC                       | 20     | -           | -            |
| n-3 PUFA-PG                 | -      | 20          | -            |
| n-3 PUFA-TAG*               | -      | -           | 13.432       |
| (DHA-55-TAG)                | -      | -           | (5.358)      |
| (EPA-28-TAG)                | -      | -           | (8.074)      |
| L-Cystine                   | 3      | 3           | 3            |
| AIN-93G Mineral Mixture     | 35     | 35          | 35           |
| AIN-93G Vitamin Mixture     | 10     | 10          | 10           |
| Choline Bitartrate          | 2.5    | 2.5         | 2.5          |
| tert-Butylhydroquinone      | 0.014  | 0.014       | 0.014        |

SoyPC, soybean phosphatidylcholine; n-3 PUFA-PG, n-3 polyunsaturated fatty acid enriched phosphatidylglycerol; n-3 PUFA-TAG, n-3 polyunsaturated fatty acid enriched triacylglycerol. \* n-3 PUFA-TAG was prepared by mixing with DHA-55-TAG and EPA-28-TAG (5.358:8.074, w/w)

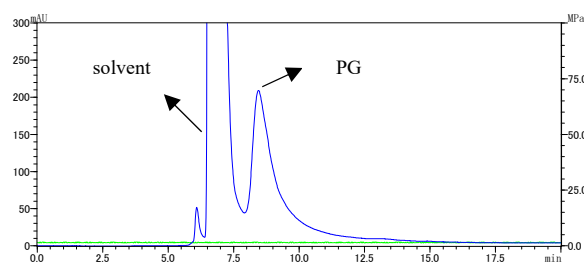

**Supplemental Figure. S1** Chromatography of prepared n-3 PUFA-PG. Phospholipids were measured using a high-performance chromatography (HPLC) system equipped with a diode array detector at 210 nm. Mightysil Si60 column (5  $\mu$ m, 4.6 mm  $\times$  250 mm) was connected for the analysis. The mobile phase was acetonitrile/methanol (98:2, v/v) containing 0.5% (v/v) sulfuric acid and eluted at the flow rate of 1.0 mL/min for 20 min, the sample injection was 10  $\mu$ L.
